# Supplementary material for: Accessing NCBI data using the NCBI Sequence Viewer and Genome Data Viewer (GDV)
Source: HighWire-hosted journal article supplement (doi:10.1101/gr.266932.120), 2020-11-25
Supplement: Supplemental_codeJDedit.zip [file Supplemental_Material_Document.pdf › gbench-3.5.0/Supplemental_Material_Document.pdf]

**Supplemental\_Code.** Complete source code for the NCBI Genome Workbench desktop analysis suite release version 3.5.0. Current and older versions of this code are available for download from our website (<https://www.ncbi.nlm.nih.gov/tools/gbench/downloads/>). Instructions for installation can be found at <https://www.ncbi.nlm.nih.gov/tools/gbench/install/>.
